# Supplementary material for: Well-defined high refractive index poly(monothiocarbonate) with tunable Abbe's numbers and glass-transition temperatures via terpolymerization
Source: Royal Society of Chemistry journal article supplement (doi:10.1039/c5py00773a), 2015-01-01
Supplement: c5py00773a1.pdf [file c5py00773a1.pdf]

## SUPPORTING INFORMATION

for

### Well-defined High Refractive Index Poly(monothiocarbonate) with Tunable Abbe's numbers and Glass-transition Temperatures via Terpolymerization

Ming Luo, Xing-Hong Zhang\*, Bin-Yang Du, Qi Wang, Zhi-Qiang Fan

*MOE Key Laboratory of Macromolecular Synthesis and Functionalization, Department of Polymer Science and Engineering, Zhejiang University, Hangzhou 310027, People's Republic of China*

E-mail: xhzhang@zju.edu.cn

**Figures:**

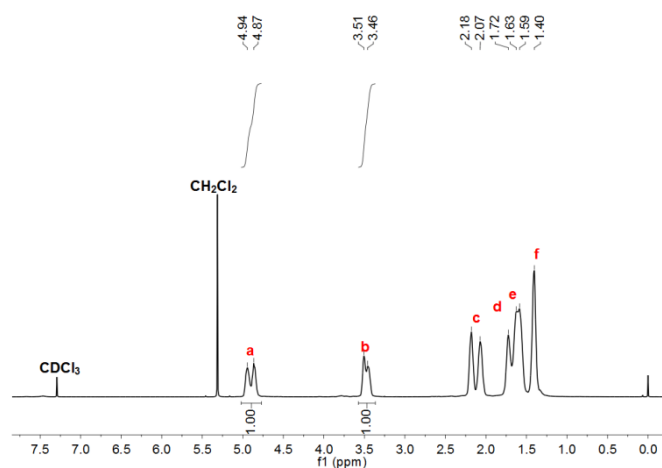

**Figure S1.** The  $^1\text{H}$  NMR spectrum of the crude product of entry 6 in Table 1.

**DSC and TGA results of PCHMTC**

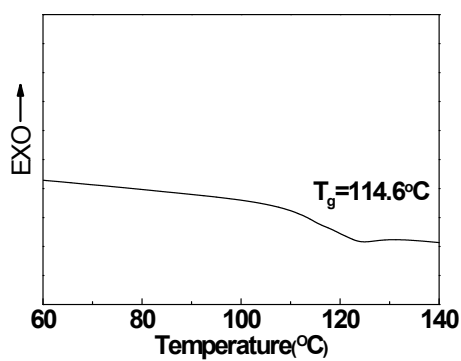

**Figure S2.** DSC curve for the copolymer of entry 3 in Table 1.

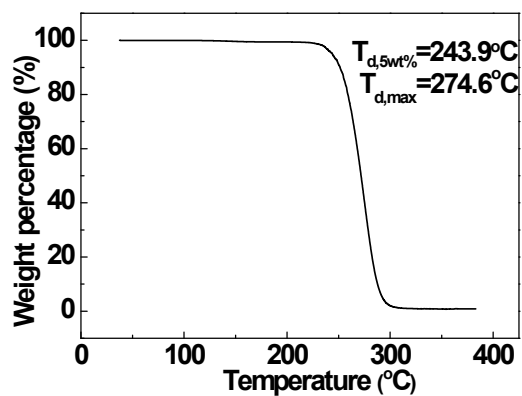

**Figure S3.** TGA curve for the copolymer of entry 3 in Table 1.

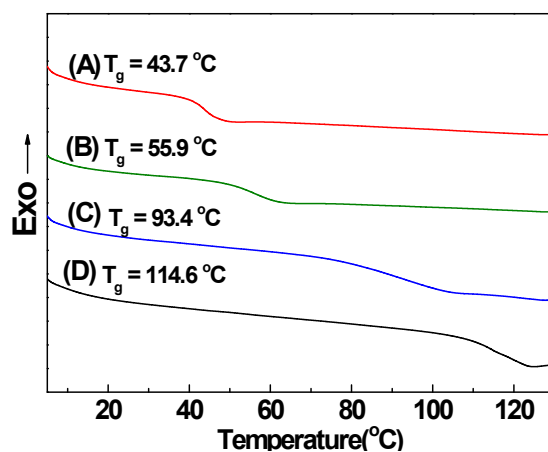

**Figure S4.** DSC thermograms of the COS/CHO/PO terpolymer containing (A) 27.5 mol % (B) 50 mol % (C) 83.1 mol% and (D) 99 mol% CHMTC linkages, respectively.

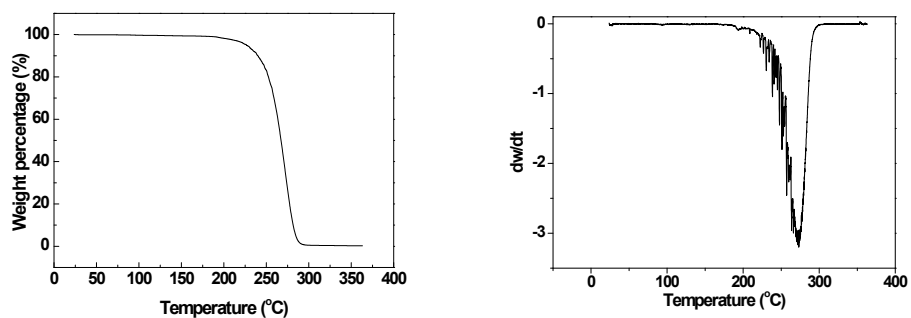

Figure S5. TGA curve for the copolymer of entry 2 in Table 2.

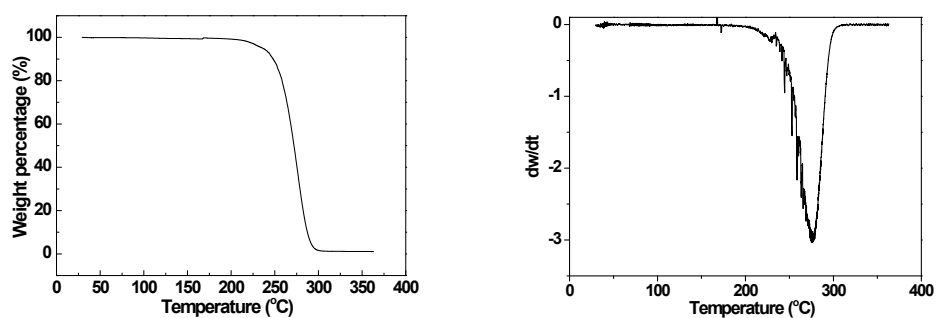

Figure S6. TGA curve for the copolymer of entry 3 in Table 2.

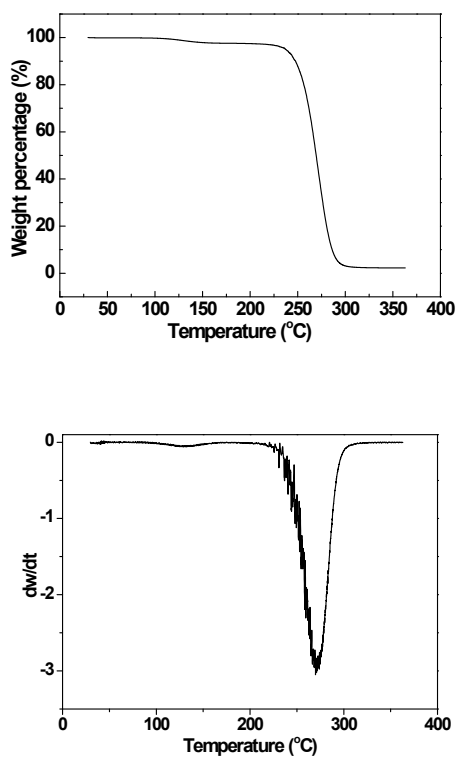

Figure S7. TGA curve for the copolymer of entry 4 in Table 2.
